# Supplementary material
Source: publisher figshare collection journal article supplement (https://tandf.figshare.com/ndownloader/files/13612685)
Supplement: Supplementary file 1 [file 13612685]

# 1 Online Supplemental Material

**Proof of Proposition 1** From equation (2) we can write the process for the vector  $z_t$  as:

$$z_t = \sqrt{\tilde{T}_t} \varepsilon_t + \rho \sqrt{\tilde{T}_t} \sqrt{\tilde{T}_{t-1}} \varepsilon_{t-1} + \rho^2 \sqrt{\tilde{T}_t} \sqrt{\tilde{T}_{t-1}} \sqrt{\tilde{T}_{t-2}} \varepsilon_{t-2} + \rho^3 \sqrt{\tilde{T}_t} \sqrt{\tilde{T}_{t-1}} \sqrt{\tilde{T}_{t-2}} \sqrt{\tilde{T}_{t-3}} \varepsilon_{t-3} + \dots$$

which implies that conditional on  $\tilde{T}$ ,  $z_t$  is the sum of independent normals. Hence,  $z_t|\tilde{T}$  is also a normal, with mean 0 and variance-covariance  $\theta^2 v_{c,t} I_n$ , where  $I_n$  is the identity matrix and  $v_{c,t}$  is the scalar defined in Proposition 1. This implies that  $k_t = z_t' z_t$  conditional on  $\tilde{T}$  is a  $G(n/2, 2\theta^2 v_{c,t})$ , and therefore  $(k_t/v_{c,t})|\tilde{T}$  is a  $G(n/2, 2\theta^2)$  (i.e. independent of  $\tilde{T}$ ). Note that  $(\varepsilon_t' \varepsilon_t)$  is also distributed as a  $G(n/2, 2\theta^2)$ , and therefore we can write  $E((k_t/v_{c,t})^s) = E((\varepsilon_t' \varepsilon_t)^s)$ . By the law of iterated expectations we can calculate the moments of  $k_t$  as  $E(k_t^s) = E(E(k_t^s|\tilde{T})) = E(v_{c,t}^s E((k_t/v_{c,t})^s|\tilde{T})) = E(v_{c,t}^s) E((\varepsilon_t' \varepsilon_t)^s)$ . Because  $(\varepsilon_t' \varepsilon_t)$  is distributed as a  $G(n/2, 2\theta^2)$ , its moments are given by (e.g. Johnson et al. (1994 p. 339)):

$$E((\varepsilon_t' \varepsilon_t)^s) = (\theta^2)^s \prod_{i=0}^{s-1} (n + 2i)$$

To calculate  $E(v_{c,t}^s)$  note that we can write  $v_{c,t}$  as  $v_{c,t} = \tilde{T}_t + \rho^2 \tilde{T}_t v_{c,(t-1)}$ . so that  $E(v_{c,t}^s) = E((\tilde{T}_t + \rho^2 \tilde{T}_t v_{c,(t-1)})^s)$ . Using the binomial theorem we can write:

$$E((\tilde{T}_t + \rho^2 \tilde{T}_t v_{c,(t-1)})^s) = E(\tilde{T}_t^s) \sum_{i=0}^s \binom{s}{i} \rho^{2i} E(v_{c,(t-1)}^i) \quad (\text{O.1})$$

Because  $E(v_{c,t}^s) = E(v_{c,(t-1)}^s)$ , (O.1) implies property (9) and the other unconditional moments stated in Proposition 1. To obtain the conditional moments, note that equation (3) can be written as:

$$k_t = \frac{\tilde{T}_t}{E(\tilde{T}_t)} (\tilde{\rho}^2 k_{t-1} + \tilde{\varepsilon}_t' \tilde{\varepsilon}_t + 2\tilde{\rho} \tilde{\varepsilon}_t' z_{t-1}) \quad (\text{O.2})$$

Because  $\tilde{\varepsilon}_t$  is independent of  $z_{t-1}$  and  $E(\tilde{\varepsilon}_t) = 0$  we obtain that  $E(\tilde{\varepsilon}_t' z_{t-1}) = 0$ . Taking into account that  $E(\tilde{\varepsilon}_t' \tilde{\varepsilon}_t) = n\theta^2$  we can take conditional expectations on both sides of (O.2) to get equations (4) and (6).

Let us calculate  $cov(k_t, k_{t-h})$  as  $cov(k_t, k_{t-h}) = E(k_t k_{t-h}) - [E(k_t)]^2$ . To derive  $E(k_t k_{t-h})$  let us use iterative expectations to rewrite equation (4) as:

$$E(k_t | k_{t-h}) = \tilde{\rho}^{2h} k_{t-h} + \sum_{i=0}^{h-1} \tilde{\rho}^{2i} (1 - \tilde{\rho}^2) E(k_t) \quad (\text{O.3})$$

Multiplying both sides of (O.3) by  $k_{t-h}$  and then taking expectations with respect to  $k_{t-h}$  we obtain:

$$E(k_t k_{t-h}) = \tilde{\rho}^{2h} E(k_{t-h}^2) + \sum_{i=0}^{h-1} \tilde{\rho}^{2i} (1 - \tilde{\rho}^2) [E(k_t)]^2 = \tilde{\rho}^{2h} E(k_{t-h}^2) + (1 - \tilde{\rho}^{2h}) [E(k_t)]^2$$

where we have used the formula for the sum of a geometric series. Thus  $cov(k_t, k_{t-h}) = E(k_t k_{t-h}) - [E(k_t)]^2 = \tilde{\rho}^{2h} (E(k_{t-h}^2) - [E(k_t)]^2) = \tilde{\rho}^{2h} var(k_t)$ . Thus, the correlation between  $k_t$  and  $k_{t-h}$  is  $\tilde{\rho}^{2h}$ .

Because the stationary distribution of  $\sigma_t^2 = 1/k_t$  is that of the product of  $(v_{c,t})^{-1}$  and  $(\varepsilon'_t \varepsilon_t)^{-1}$ , with  $(v_{c,t})^{-1}$  being independent of  $(\varepsilon'_t \varepsilon_t)^{-1}$ , the expectation  $E(\sigma_t^{2s})$  is finite if and only if both  $E((v_{c,t})^{-s})$  and  $E((\varepsilon'_t \varepsilon_t)^{-s})$  are finite. Because  $(\varepsilon'_t \varepsilon_t)^{-1}$  is an inverted gamma with  $n$  degrees of freedom,  $E((\varepsilon'_t \varepsilon_t)^{-s})$  is finite only if  $2s < n$ . In addition, from  $v_{c,t} = \tilde{T}_t(1 + \rho^2 v_{c,(t-1)})$  it follows that:

$$\frac{1}{v_{c,t}} = \frac{1}{\tilde{T}_t} \frac{1}{1 + \rho^2 v_{c,(t-1)}}$$

Because  $(1 + \rho^2 v_{c,(t-1)})^{-s} < 1$ , it follows that  $E((1 + \rho^2 v_{c,(t-1)})^{-s})$  is finite because the density function of  $v_{c,(t-1)}$  integrates up to 1. Because  $\tilde{T}_t$  follows a  $B(\underline{\alpha}, \underline{\beta})$ ,  $E(\tilde{T}_t^{-s})$  is finite if and only if  $\underline{\alpha} > s$ . Putting both conditions together,  $E(\sigma_t^{2s})$  is finite when  $\underline{\alpha} > s$  and  $n > 2s$ .

For the ARG model (i.e.  $\tilde{T}_t = 1$  for all  $t$ ), the expressions for the expected value and variance of  $\sigma_t^2$  are derived from the properties of the inverted gamma distribution (e.g. Bauwens et al. (1999. p.292)). To calculate the correlations between  $\sigma_t^2$  and  $\sigma_{t-s}^2$  in the ARG model, let us first proof the following property:

$$E(\sigma_t^2 | \sigma_{t-s}^2) = \int \left( \prod_{i=2}^s (u_i)^{n/2} \right) \frac{1}{\theta^2 (n-2)} \exp \left( -\frac{(1-u_s)}{2\theta^2} \rho^2 \frac{1}{\sigma_{t-s}^2} \right) p(u_1) du_1 \quad (\text{O.4})$$

where  $u_1 \sim B((n-2)/2, 1)$ ,  $p(u_1)$  is the density function of  $u_1$  and  $u_s = 1/(1 + \rho^2(1 - u_{s-1}))$  for  $s \geq 2$ . To proof this note that the Poisson representation in (10) implies that  $k_t | (k_{t-1}, h_t)$  is a Gamma which in turn implies that  $\sigma_t^2 | (\sigma_{t-1}^2, h_t)$  is an  $IG_2(\theta^{-2}, n + 2h_t)$ , such that  $E(\sigma_t^2 | (\sigma_{t-1}^2, h_t)) = \theta^{-2}/(n + 2h_t - 2)$ . We can therefore integrate out  $h_t$  to obtain  $E(\sigma_t^2 | \sigma_{t-1}^2)$ .as:

$$E(\sigma_t^2 | \sigma_{t-1}^2) = \frac{1}{\theta^2 \exp(\lambda_t)} \sum_{i=0}^{\infty} \frac{\lambda_t^i}{i!} \left( \frac{1}{n + 2i - 2} \right), \text{ where } \lambda_t = \frac{\rho^2}{2\sigma_{t-1}^2 \theta^2} \quad (\text{O.5})$$

Note that  $1/(n + 2i - 2) = (n - 2)^{-1} [n/2 - 1]_i / [n/2]_i = (n - 2)^{-1} E((u_1)^i)$ , where  $[n/2]_i$  is the rising

factorial. Therefore (O.5) can be written as:

$$\begin{aligned}
E(\sigma_t^2|\sigma_{t-1}^2) &= \int \frac{1}{\theta^2 \exp(\lambda_t)} \frac{1}{(n-2)} \sum_{i=0}^{\infty} \frac{\lambda_t^i}{i!} (u_1)^i p(u_1) du_1 \\
&= \int \frac{1}{\theta^2 \exp(\lambda_t)} \frac{1}{(n-2)} \exp(\lambda_t u_1) p(u_1) du_1 \\
&= \int \frac{1}{\theta^2} \frac{1}{(n-2)} \exp\left(-\frac{(1-u_1)}{2\theta^2} \rho^2 \frac{1}{\sigma_{t-1}^2}\right) p(u_1) du_1
\end{aligned} \tag{O.6}$$

which is the same as (O.4) for the case  $s = 1$ . To proof (O.4) for  $s = 2$  we need to integrate  $E(\sigma_t^2|\sigma_{t-1}^2)$  with respect to  $p(\sigma_{t-1}^2|\sigma_{t-2}^2)$  using expression (O.6). This can be done by first integrating with respect to  $p(\sigma_{t-1}^2|h_{t-1}, \sigma_{t-2}^2)$  (which is a  $IG_2(\theta^{-2}, n+2h_{t-1})$ ) and then integrating out  $h_{t-1}$  (using a  $P(\lambda_{t-1})$ ) as follows:

$$\begin{aligned}
E(\sigma_t^2|\sigma_{t-2}^2) &= \int E(\sigma_t^2|\sigma_{t-1}^2) p(\sigma_{t-1}^2|\sigma_{t-2}^2) d\sigma_{t-1}^2 \\
&= \int E(\sigma_t^2|\sigma_{t-1}^2) \sum_{h_{t-1}=0}^{\infty} p(\sigma_{t-1}^2|h_{t-1}, \sigma_{t-2}^2) p(h_{t-1}) d\sigma_{t-1}^2 \\
&= \sum_{h_{t-1}=0}^{\infty} \int E(\sigma_t^2|\sigma_{t-1}^2) p(\sigma_{t-1}^2|h_{t-1}, \sigma_{t-2}^2) p(h_{t-1}) d\sigma_{t-1}^2
\end{aligned} \tag{O.7}$$

Using the properties of the inverse Gamma distribution, we can obtain that:

$$\int E(\sigma_t^2|\sigma_{t-1}^2) p(\sigma_{t-1}^2|h_{t-1}, \sigma_{t-2}^2) d\sigma_{t-1}^2 = \int (u_2)^{\frac{n+2h_{t-1}}{2}} \frac{1}{\theta^2} \frac{1}{(n-2)} p(u_1) du_1$$

Therefore, (O.7) can be written as:

$$E(\sigma_t^2|\sigma_{t-2}^2) = \sum_{h_{t-1}=0}^{\infty} \int (u_2)^{\frac{n+2h_{t-1}}{2}} \frac{1}{\theta^2} \frac{1}{(n-2)} p(u_1) du_1 p(h_{t-1})$$

Using the properties of the Poisson distribution, we can obtain that:

$$\sum_{h_{t-1}=0}^{\infty} \int (u_2)^{\frac{n+2h_{t-1}}{2}} \frac{1}{\theta^2} \frac{1}{(n-2)} p(u_1) du_1 p(h_{t-1}) = \int (u_2)^{\frac{n}{2}} \frac{1}{\theta^2 (n-2)} \exp\left(-\frac{(1-u_2)}{2\theta^2} \rho^2 \frac{1}{\sigma_{t-2}^2}\right) p(u_1) du_1$$

The proof for  $s > 2$  can be obtained by repeating the same process, that is, integrate out with respect to  $p(\sigma_{t-s+1}^2|h_{t-s+1}, \sigma_{t-s}^2)$  and then integrate out  $h_{t-s+1}$  (using a  $P(\lambda_{t-s+1})$ ).

$E(\sigma_t^2\sigma_{t-s}^2)$  can be obtained by using expression (O.4) to calculate  $E(\sigma_t^2\sigma_{t-s}^2|\sigma_{t-s}^2)$  and then integrate out  $\sigma_{t-s}^2$  using the stationary distribution  $IG_2((1-\rho^2)/\theta^2, n)$ . This gives:

$$E(\sigma_t^2\sigma_{t-s}^2) = E(\sigma_{t-s}^2 E(\sigma_t^2|\sigma_{t-s}^2)) = \sigma_{t-s}^2 E(\sigma_t^2|\sigma_{t-s}^2) p(\sigma_{t-s}^2) d\sigma_{t-s}^2$$

Using the properties of the gamma function we have that  $\Gamma(n/2-1)/\Gamma(n/2) = (n/2-1)^{-1}$  and therefore  $E(\sigma_t^2 \sigma_{t-s}^2)$  can be written as:

$$E(\sigma_t^2 \sigma_{t-s}^2) = \frac{(1-\rho^2)^{n/2}}{(2\theta^2)^2 (n/2-1)^2} \int \left( \prod_{i=2}^s (u_i)^{n/2} \right) \left( \frac{1}{1-\rho^2 u_s} \right)^{n/2-1} p(u_1) du_1 \quad (\text{O.8})$$

By using the definition of  $u_s$  it is possible to verify that:

$$\left( \prod_{i=2}^s u_i \right) \frac{1}{1-\rho^2 u_s} = \left( \prod_{i=2}^{s-1} u_i \right) \frac{u_s}{1-\rho^2 u_s} = \left( \prod_{i=2}^{s-1} u_i \right) \frac{1}{1-\rho^2 u_{s-1}} = \frac{1}{1-\rho^2 u_1}$$

and:

$$\prod_{i=2}^s u_i = u_s u_{s-1} \prod_{i=2}^{s-2} u_i = \frac{1}{1 + (\rho^2 + \rho^4)(1 - u_{s-2})} \prod_{i=2}^{s-2} u_i = \frac{1}{1 + \rho_s^2(1 - u_1)}$$

where  $\rho_s^2 = \sum_{g=1}^{s-1} \rho^{2g}$ . Hence, the integral in expression (O.8) can be written as:

$$\begin{aligned} E \left[ \left( \prod_{i=2}^s (u_i)^{n/2} \right) \left( \frac{1}{1-\rho^2 u_s} \right)^{n/2-1} \right] &= E \left[ \frac{(1-\rho^2 u_1)^{-(n/2-1)}}{1 + \rho_s^2(1 - u_1)} \right] \\ &= E \left[ \frac{(1 + \rho_s^2)^{-1}}{1 - \hat{\rho}_s^2 u_1} \left( \frac{1}{1 - \rho^2 u_1} \right)^{n/2-1} \right] \end{aligned} \quad (\text{O.9})$$

where the expectation is calculated with respect to  $u_1$  and  $\hat{\rho}_s^2 = \rho_s^2/(1 + \rho_s^2)$ . By expanding  $(1/(1 - \rho^2 u_1))^{n/2-1}$  as a hypergeometric series (e.g. Muirhead (1985, p. 259)) and using basic properties of the beta distribution, it is possible to show that:

$$E \left[ (u_1^h) \left( \frac{1}{1 - \rho^2 u_1} \right)^{n/2-1} \right] = \left( \frac{[n/2-1]_h}{[n/2]_h} \right) \left( {}_2F_1 \left( \frac{n}{2} - 1, \frac{n}{2} - 1 + h; \frac{n}{2} + h; \rho^2 \right) \right)$$

and therefore the expectation in (O.9) can be written as:

$$\begin{aligned} &\frac{1}{1 + \rho_s^2} \sum_{h=0}^{\infty} \left[ (\hat{\rho}_s^2)^h \left( \frac{[n/2-1]_h}{[n/2]_h} \right) \left( {}_2F_1 \left( \frac{n}{2} - 1, \frac{n}{2} - 1 + h; \frac{n}{2} + h; \rho^2 \right) \right) \right] \\ &= \frac{1}{1 + \rho_s^2} \sum_{h=0}^{\infty} \sum_{i=0}^{\infty} \left[ \frac{(\hat{\rho}_s^2)^h (\rho^2)^i}{h!i!} [1]_h \frac{[n/2-1]_{h+i}}{[n/2]_{h+i}} [n/2-1]_i \right] = \frac{1}{1 + \rho_s^2} F_1 \left[ \frac{n}{2} - 1; 1, \frac{n}{2} - 1; \frac{n}{2}; \hat{\rho}_s^2, \rho^2 \right] \end{aligned}$$

where  $F_1[\cdot]$  is an Appell series of the first type (e.g. Slater (1966, p. 210)), which in our case can be reduced to a  ${}_2F_1(\cdot)$  series (Slater (1966, p. 219)):

$$\begin{aligned} F_1 \left[ \frac{n}{2} - 1; 1, \frac{n}{2} - 1; \frac{n}{2}; \hat{\rho}_s^2, \rho^2 \right] &= \left( \frac{1}{1 - \rho^2} \right)^{n/2-1} \left[ {}_2F_1 \left( \frac{n}{2} - 1, 1; \frac{n}{2}; \frac{\hat{\rho}_s^2 - \rho^2}{1 - \rho^2} \right) \right] = \\ &\left( \frac{1}{1 - \rho^2} \right)^{n/2-1} \left[ {}_2F_1 \left( \frac{n}{2} - 1, 1; \frac{n}{2}; \frac{-\rho^{2s}}{1 - \rho^{2s}} \right) \right] \end{aligned}$$

Using the Euler relationships (e.g. Muirhead (1982, p. 265) ), the  ${}_2F_1(\cdot)$  series can be written as:

$${}_2F_1\left(\frac{n}{2}-1, 1; \frac{n}{2}; \frac{-\rho^{2s}}{1-\rho^{2s}}\right) = (1-\rho^{2s}) \left[{}_2F_1\left(1, 1; \frac{n}{2}; \rho^{2s}\right)\right]$$

Putting all this together the expectation in (O.9) can be written as:

$$\begin{aligned} E\left[\left(\prod_{i=2}^s (u_i)^{n/2}\right) \left(\frac{1}{1-\rho^2 u_s}\right)^{n/2-1}\right] &= \frac{1-\rho^{2s}}{1+\rho_s^2} \left(\frac{1}{1-\rho^2}\right)^{n/2-1} \left[{}_2F_1\left(1, 1; \frac{n}{2}; \rho^{2s}\right)\right] = \\ &= (1-\rho^2) \left(\frac{1}{1-\rho^2}\right)^{n/2-1} \left[{}_2F_1\left(1, 1; \frac{n}{2}; \rho^{2s}\right)\right] \end{aligned}$$

where we have used that a geometric series can be written as  $1+\rho_s^2 = (1-\rho^{2s})/(1-\rho^2)$ . This proves that (O.8) is equal to:

$$E(\sigma_t^2 \sigma_{t-s}^2) = \frac{(1-\rho^2)^2}{(2\theta^2)^2 (n/2-1)^2} \left[{}_2F_1\left(1, 1; \frac{n}{2}; \rho^{2s}\right)\right]$$

The correlation  $corr(\sigma_t^2, \sigma_{t-s}^2)$  can then be calculated as  $(E(\sigma_t^2 \sigma_{t-s}^2) - E(\sigma_t^2)E(\sigma_{t-s}^2)) / \sqrt{var(\sigma_t^2)var(\sigma_{t-s}^2)}$ , where  $E(\sigma_t^2)$  and  $var(\sigma_t^2)$  are obtained from the properties of the inverted gamma distribution (e.g. Bauwens et al. (1999. p.292)).
